# Supplementary material
Source: publisher figshare collection journal article supplement (https://acs.figshare.com/ndownloader/files/5855682)
Supplement: Supplementary file 1 [file 5855682]

# **PEG-Fmoc-Ibuprofen Conjugate as a Dual Functional Nanomicellar Carrier for Paclitaxel**

<sup>1</sup>Min Zhao, <sup>2</sup>Yixian Huang, <sup>2</sup>Yichao Chen, <sup>2</sup>Jieni Xu, <sup>2</sup>Song Li\*, <sup>1</sup>Xingjie Guo\*

<sup>1</sup>School of Pharmacy, Shenyang Pharmaceutical University, Shenyang 110016, China; <sup>2</sup>Center for Pharmacogenetics, Department of Pharmaceutical Sciences, School of Pharmacy, University of Pittsburgh, Pittsburgh, PA 15261, USA

\*Corresponding authors:

Song Li, Center for Pharmacogenetics, Department of Pharmaceutical Sciences, School of Pharmacy, University of Pittsburgh, 313 Salk Pavilion, 3501 Terrace Street, Pittsburgh, PA 15261, USA; Phone: 412-383-7976; Fax: 412-648-1664; Email: sol4@pitt.edu

Xingjie Guo, School of Pharmacy, Shenyang Pharmaceutical University, 103 Wenhua Road, Shenyang 110016, China; Phone: +86 24 23986285; Fax: +86-24-23986285; Email: syykdx410@163.com

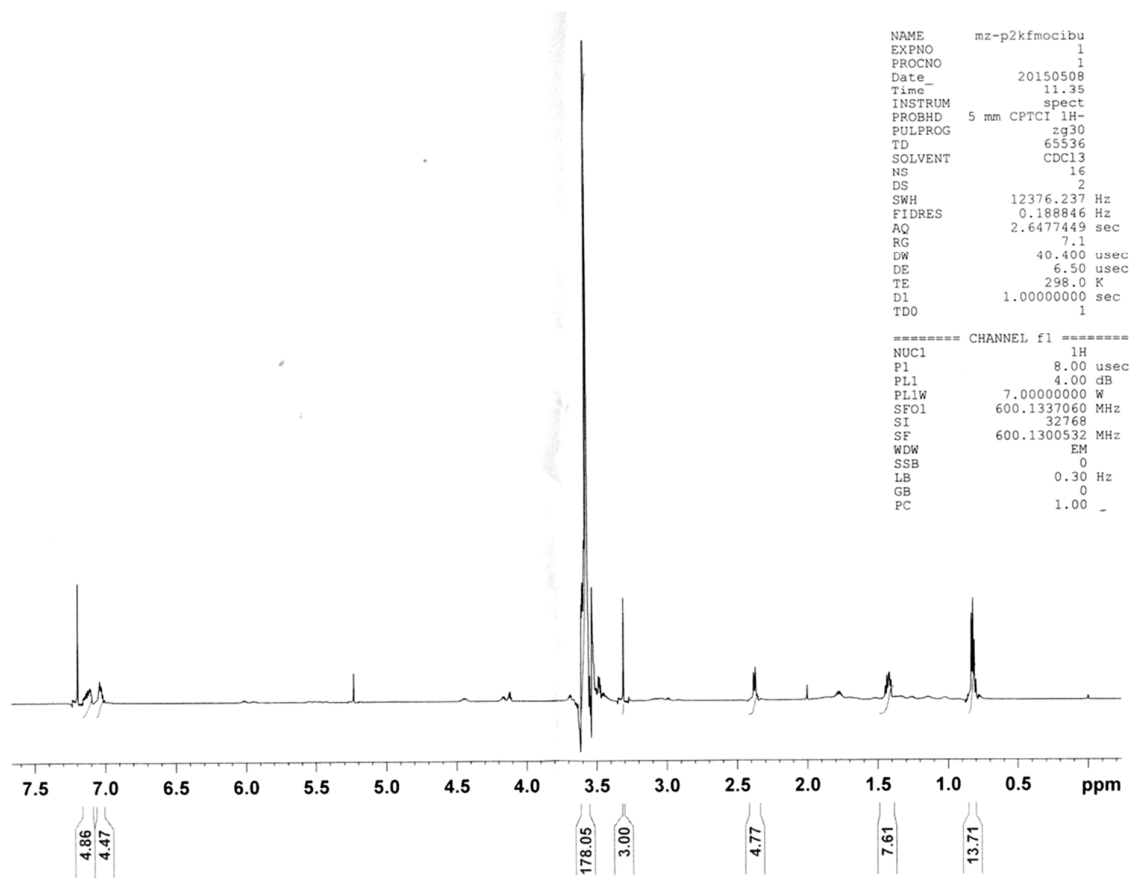

Figure S1.  $^1\text{H}$  NMR spectrum of PEG<sub>2K</sub>-FIbu in  $\text{CDCl}_3$ .
